# Supplementary material
Source: Springer Nature journal article supplement (https://www.springermedizin.de/resource/supplementary/12885_2012_3854_MOESM2_ESM.pdf/9464604)

**A**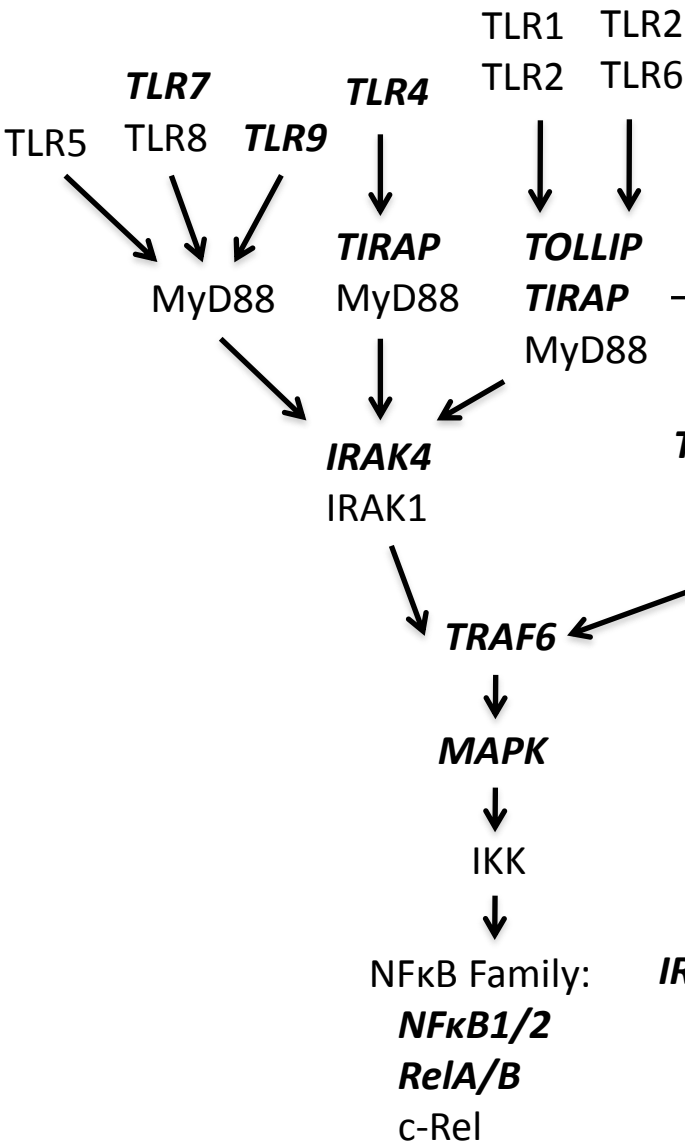**B**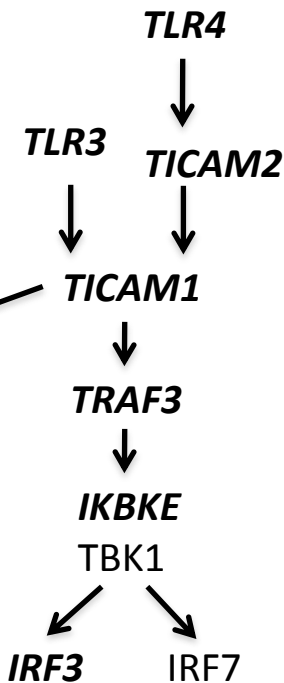

Supplement: MOESM2 [file 9464604]
